# Supplementary material for: Navigating the unknown: A qualitative analysis exploring patient experience in the Emergency Department
Source: Research Square preprint supplement (doi:10.21203/rs.3.rs-5045716/v1), 2024-12-16
Supplement: Supplementary file 1 [file 0ae125a4539fbcdf6c95f7f5.docx]

**Appendix 1: Interview guide**

| **Primary Questions** | **Sub-questions** |
| --- | --- |
| Tell me about your experience in the emergency department | - What went well? - What went not so well? |
| How could we have made your experience better? |  |
| Describe your expectations prior to your ED visit. Were your expectations met? | - If not, why? - If so, how? |
| What mattered most to you during your ED visit? | - Were you ever asked this question? - How did it contribute to your ED experience? - Was your WMM addressed during your ED visit? - How could we have done a better job addressing your WMM? |
| Thinking back to your ED visit, at what points during your visit did you feel you had to wait a long time for something? | - What can we do to make these situations better? - How can being given an estimated wait time upon arrival to the ED affect these situations? |
| Tell me about how your care team kept you updated on what was going on with your care? | - What did we do well? - What could have been done better? |
| How well did you feel your care team communicated with each other in the coordination of your care? | - Were your questions answered consistently between team members? - Was the plan communicated with you consistent between team members? |
| Describe the ED environment. |  |
| Would you return to this ED in the future? | - Why or why not? |
| If you feel comfortable doing so, can you tell me about any experiences you or a loved one have had with discrimination, microaggressions, or harassment of any form (including based on race/ethnicity, age, religion, socioeconomic status, gender, or sexual orientation) while visiting an IU Health Emergency Department |  |
| Tell me about your experience reporting the incident? | - What factors influenced you to/not to report the incident? |
| Did someone follow up with you after reporting the incident (i.e. patient advocate)? | - Were you informed of the process for reporting? - Were you informed about the outcome/actions taken? |
| How would you like to report an incident? | - How could we make this process better? - How could we make the process more transparent? - What can we do better to make sure patients know how to report an incident and feel comfortable doing so? |
| How does cost-of-care and insurance status influence your decision to/not to visit the ED? |  |
| Tell me about how cost-of-care and insurance status influences your decision making at any point during your visit? | - Did you refuse or delay any services (i.e. imaging, lab work, etc) because of concerns about cost? |
| Tell me about your current knowledge of financial assistance services available at IU Health? | - Tell me about your experience with financial assistance services available through IU Health? - How can we help to address financial concerns or stress you may have during your ED visit? |
| How well did you understand your diagnosis at the end of your visit? |  |
| How well did you understand your follow up plan? |  |
| How well did you understand your home care/medications that were prescribed? |  |
| When you were discharged, were you discharged by your physician and at least one other team member? | - If so, how do you feel this added to your ED experience? |
